# Supplementary material
Source: MDPI journal article supplement (https://www.mdpi.com/2073-4395/10/12/2004)

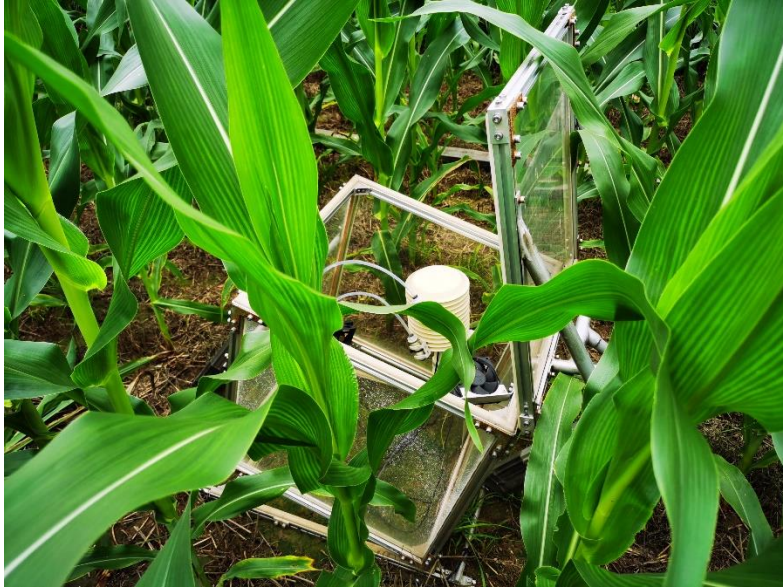

Figure S1 Automatic chamber

Supplement: s1 [file s1]
